# Supplementary material for: Identification and Genetic Dissection of Resistance to Red Crown Rot Disease in a Diverse Soybean Germplasm Population
Source: MDPI journal article supplement (doi:10.3390/plants13070940), 2024-03-24
Supplement: s1 [file s1]

**Table S1.** Analysis of variance of three traits for RCR evaluation of the 299 worldwide soybean accessions

| Trait          | Variation source | <i>DF</i> | <i>SS</i> | <i>MS</i> | <i>F</i> | <i>Pr.</i> |
|----------------|------------------|-----------|-----------|-----------|----------|------------|
| Emergence rate | Replication      | 2         | 54.40     | 27.20     | 1.08     |            |
|                | Materials        | 298       | 130948.27 | 439.42    | 17.45    | <.001      |
|                | Residual         | 596       | 15012.26  | 25.19     |          |            |
| Survival rate  | Replication      | 2         | 119.74    | 59.87     | 3.97     |            |
|                | Materials        | 298       | 199159.96 | 668.32    | 44.33    | <.001      |
|                | Residual         | 596       | 8984.59   | 15.07     |          |            |
| Disease score  | Replication      | 2         | 0.062     | 0.031     | 0.57     |            |
|                | Materials        | 298       | 649.35    | 2.18      | 39.83    | <.001      |
|                | Residual         | 596       | 32.60     | 0.055     |          |            |

*DF*= degree of freedom. *SS* = sum of squares. *MS* = mean square. *F*= *F* statistic value. *Pr.* = probability.

**Table S3.** Single-nucleotide polymorphism (SNP) density among the 299 worldwide soybean accessions used in this study

| Chr. | Length (bp)      | Length (kb)      | Length (Mb)   | No. of SNPs  | Kbs/SNP       | SNPs/Mb       |
|------|------------------|------------------|---------------|--------------|---------------|---------------|
| 1    | 56830220         | 56830.22         | 56.83         | 1552         | 36.6          | 27.31         |
| 2    | 48567990         | 48567.99         | 48.57         | 2206         | 22.0          | 45.42         |
| 3    | 45712413         | 45712.41         | 45.71         | 1545         | 29.6          | 33.80         |
| 4    | 52360037         | 52360.04         | 52.36         | 1823         | 28.7          | 34.82         |
| 5    | 42194057         | 42194.06         | 42.19         | 1828         | 23.1          | 43.32         |
| 6    | 51316639         | 51316.64         | 51.32         | 1770         | 29.0          | 34.49         |
| 7    | 44608799         | 44608.80         | 44.61         | 1922         | 23.2          | 43.09         |
| 8    | 47796376         | 47796.38         | 47.80         | 2317         | 20.6          | 48.48         |
| 9    | 50149215         | 50149.22         | 50.15         | 1675         | 29.9          | 33.40         |
| 10   | 51546040         | 51546.04         | 51.55         | 1954         | 26.4          | 37.91         |
| 11   | 34718252         | 34718.25         | 34.72         | 1470         | 23.6          | 42.34         |
| 12   | 40077424         | 40077.42         | 40.08         | 1554         | 25.8          | 38.77         |
| 13   | 45810724         | 45810.72         | 45.81         | 2327         | 19.7          | 50.80         |
| 14   | 49022524         | 49022.52         | 49.02         | 1763         | 27.8          | 35.96         |
| 15   | 51670112         | 51670.11         | 51.67         | 2245         | 23.0          | 43.45         |
| 16   | 37879369         | 37879.37         | 37.88         | 1575         | 24.1          | 41.58         |
| 17   | 41616549         | 41616.55         | 41.62         | 1833         | 22.7          | 44.04         |
| 18   | 57968596         | 57968.60         | 57.97         | 2899         | 20.0          | 50.01         |
| 19   | 50730824         | 50730.82         | 50.73         | 2120         | 23.9          | 41.79         |
| 20   | 47895551         | 47895.55         | 47.90         | 1498         | 32.0          | 31.28         |
|      | <b>948471711</b> | <b>948471.71</b> | <b>948.47</b> | <b>37876</b> | <b>511.74</b> | <b>802.05</b> |

bp= base pair. Kb = kilobase. Mb= megabase. SNP = single nucleotide polymorphism.

**Table S4.** List of primers used for the qPCR assay

| Gene ID (Wm82.a2.v1)   | Primer Sequences (5'-3')                                  | Use            |
|------------------------|-----------------------------------------------------------|----------------|
| <i>Glyma.08G074600</i> | Fw: CGATCAATATCTCCTGTCGGAA<br>Rv: CTTTCTAGGACCACCACTGTAG  | qPCR assay     |
| <i>Glyma.08G074700</i> | Fw: AGTATAGTTGACGAACCTTGGCA<br>Rv: CTGAATGCTGAAGATTTGACGG | qPCR assay     |
| <i>Glyma.12G043200</i> | Fw: GAAGCAGTTGATCGTACACATC<br>Rv: GTTCGGTGTATGGATTGTAAGC  | qPCR assay     |
| <i>Glyma.12G043400</i> | Fw: ATTATAACAGCGTCTACCCAGG<br>Rv: GTTTTAACAAGCAAGCCAACAC  | qPCR assay     |
| <i>Glyma.12G043500</i> | Fw: CAAATACTTCTCCGCCCTCC<br>Rv: TAGAGAAGCTCCAGGACGAT      | qPCR assay     |
| <i>Glyma.12G043600</i> | Fw: GAGGAAATGGCATTCTCGTAAC<br>Rv: CTCTGTCATTGCTGTGTTTGAA  | qPCR assay     |
| <i>GmActin11</i>       | GGTGGTTCTATCTTGGCATC<br>CTTTCGCTTCAATAACCCTA              | Reference gene |
